# Supplementary material for: Does Osteopathic Heart-Focused Palpation Modify Heart Rate Variability in Stressed Participants with Musculoskeletal Pain? A Randomised Controlled Pilot Study
Source: MDPI journal article supplement (doi:10.3390/healthcare12020138), 2024-01-08
Supplement: s1 [file s1]

# Supplementary material

Table S1: CONSORT checklist

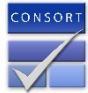

## CONSORT 2010 checklist of information to include when reporting a pilot or feasibility trial

| Section/Topic             | Item No | Checklist item                                                                                                                                               | Reported on page No |
|---------------------------|---------|--------------------------------------------------------------------------------------------------------------------------------------------------------------|---------------------|
| <b>Title and abstract</b> |         |                                                                                                                                                              |                     |
|                           | 1a      | Identification as a pilot or feasibility randomised trial in the title                                                                                       | 1                   |
|                           | 1b      | Structured summary of pilot trial design, methods, results, and conclusions (for specific guidance see CONSORT abstract extension for pilot trials)          | 1                   |
| <b>Introduction</b>       |         |                                                                                                                                                              |                     |
| Background and objectives | 2a      | Scientific background and explanation of rationale for future definitive trial, and reasons for randomised pilot trial                                       | 1-3                 |
|                           | 2b      | Specific objectives or research questions for pilot trial                                                                                                    | 3                   |
| <b>Methods</b>            |         |                                                                                                                                                              |                     |
| Trial design              | 3a      | Description of pilot trial design (such as parallel, factorial) including allocation ratio                                                                   | 3                   |
|                           | 3b      | Important changes to methods after pilot trial commencement (such as eligibility criteria), with reasons                                                     | 15                  |
| Participants              | 4a      | Eligibility criteria for participants                                                                                                                        | 3                   |
|                           | 4b      | Settings and locations where the data were collected                                                                                                         | 3                   |
|                           | 4c      | How participants were identified and consented                                                                                                               | 3, 7, 15            |
| Interventions             | 5       | The interventions for each group with sufficient details to allow replication, including how and when they were actually administered                        | 3-5                 |
| Outcomes                  | 6a      | Completely defined prespecified assessments or measurements to address each pilot trial objective specified in 2b, including how and when they were assessed | 5-6                 |
|                           | 6b      | Any changes to pilot trial assessments or measurements after the pilot trial commenced, with reasons                                                         | 15                  |

|                                                      |     |                                                                                                                                                                                             |      |
|------------------------------------------------------|-----|---------------------------------------------------------------------------------------------------------------------------------------------------------------------------------------------|------|
|                                                      | 6c  | If applicable, prespecified criteria used to judge whether, or how, to proceed with future definitive trial                                                                                 | 5-6  |
| Sample size                                          | 7a  | Rationale for numbers in the pilot trial                                                                                                                                                    | 6    |
|                                                      | 7b  | When applicable, explanation of any interim analyses and stopping guidelines                                                                                                                | 5    |
| Randomisation:                                       |     |                                                                                                                                                                                             |      |
| Sequence generation                                  | 8a  | Method used to generate the random allocation sequence                                                                                                                                      | 7    |
|                                                      | 8b  | Type of randomisation(s); details of any restriction (such as blocking and block size)                                                                                                      | 7    |
| Allocation concealment mechanism                     | 9   | Mechanism used to implement the random allocation sequence (such as sequentially numbered containers), describing any steps taken to conceal the sequence until interventions were assigned | 7    |
| Implementation                                       | 10  | Who generated the random allocation sequence, who enrolled participants, and who assigned participants to interventions                                                                     | 7    |
| Blinding                                             | 11a | If done, who was blinded after assignment to interventions (for example, participants, care providers, those assessing outcomes) and how                                                    | 7    |
|                                                      | 11b | If relevant, description of the similarity of interventions                                                                                                                                 | NA   |
| Statistical methods                                  | 12  | Methods used to address each pilot trial objective whether qualitative or quantitative                                                                                                      | 7    |
| <b>Results</b>                                       |     |                                                                                                                                                                                             |      |
| Participant flow (a diagram is strongly recommended) | 13a | For each group, the numbers of participants who were approached and/or assessed for eligibility, randomly assigned, received intended treatment, and were assessed for each objective       | 7-8  |
|                                                      | 13b | For each group, losses and exclusions after randomisation, together with reasons                                                                                                            | 7-8  |
| Recruitment                                          | 14a | Dates defining the periods of recruitment and follow-up                                                                                                                                     | 8    |
|                                                      | 14b | Why the pilot trial ended or was stopped                                                                                                                                                    | 6    |
| Baseline data                                        | 15  | A table showing baseline demographic and clinical characteristics for each group                                                                                                            | 8-9  |
| Numbers analysed                                     | 16  | For each objective, number of participants (denominator) included in each analysis. If relevant, these numbers should be by randomised group                                                | 7    |
| Outcomes and estimation                              | 17  | For each objective, results including expressions of uncertainty (such as 95% confidence interval) for any estimates. If relevant, these results should be by randomised group              | 9-10 |
| Ancillary analyses                                   | 18  | Results of any other analyses performed that could be used to inform the future definitive trial                                                                                            | NA   |
| Harms                                                | 19  | All important harms or unintended effects in each group (for specific guidance see CONSORT for harms)                                                                                       | 9    |

|                          |     |                                                                                                                                                     |       |
|--------------------------|-----|-----------------------------------------------------------------------------------------------------------------------------------------------------|-------|
|                          | 19a | If relevant, other important unintended consequences                                                                                                | NA    |
| <b>Discussion</b>        |     |                                                                                                                                                     |       |
| Limitations              | 20  | Pilot trial limitations, addressing sources of potential bias and remaining uncertainty about feasibility                                           | 12-13 |
| Generalisability         | 21  | Generalisability (applicability) of pilot trial methods and findings to future definitive trial and other studies                                   | 11-12 |
| Interpretation           | 22  | Interpretation consistent with pilot trial objectives and findings, balancing potential benefits and harms, and considering other relevant evidence | 10-11 |
|                          | 22a | Implications for progression from pilot to future definitive trial, including any proposed amendments                                               | 13-14 |
| <b>Other information</b> |     |                                                                                                                                                     |       |
| Registration             | 23  | Registration number for pilot trial and name of trial registry                                                                                      | 3, 15 |
| Protocol                 | 24  | Where the pilot trial protocol can be accessed, if available                                                                                        | NA    |
| Funding                  | 25  | Sources of funding and other support (such as supply of drugs), role of funders                                                                     | 15    |
|                          | 26  | Ethical approval or approval by research review committee, confirmed with reference number                                                          | 3, 15 |

Modified after: Eldridge SM, Chan CL, Campbell MJ, Bond CM, Hopewell S, Thabane L, et al. CONSORT 2010 statement: extension to randomised pilot and feasibility trials. BMJ. 2016;355.
